# Supplementary material for: Gene expression analysis of skin grafts and cultured keratinocytes using synthetic RNA normalization reveals insights into differentiation and growth control
Source: PubMed Central journal article supplement (PMC4480911; doi:10.1186/s12864-015-1671-5), 2015-06-25
Supplement: 12864_2015_1671_MOESM5_ESM.pdf [file 12864_2015_1671_MOESM5_ESM.pdf]

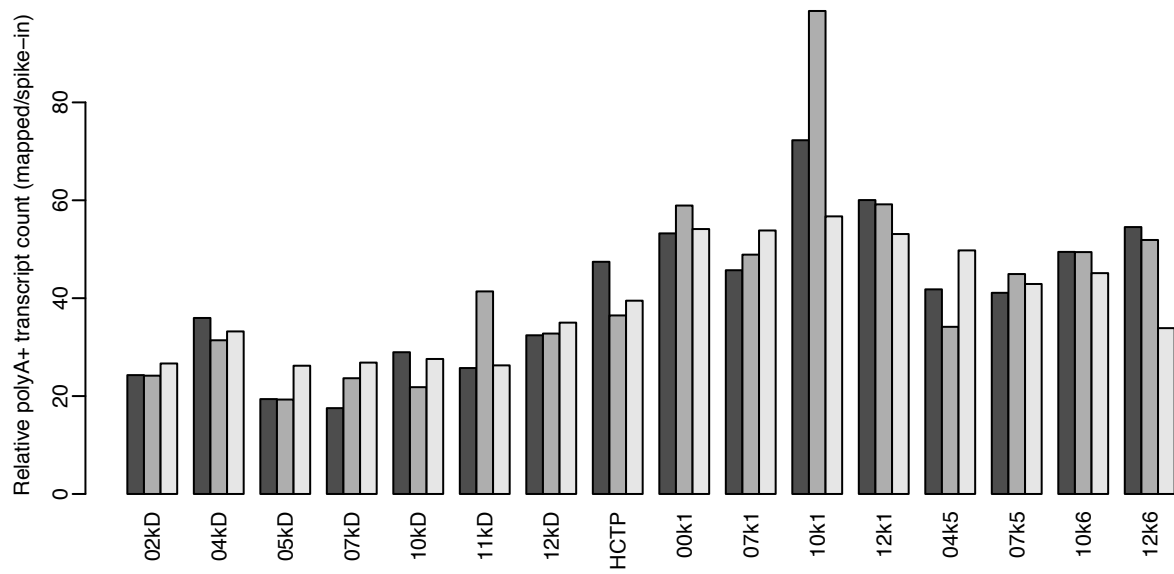

Figure S1
